# Supplementary material for: The Monte Carlo approach to model and predict the melting point of imidazolium ionic liquids using hybrid optimal descriptors
Source: Royal Society of Chemistry journal article supplement (doi:10.1039/d1ra06861j), 2021-01-01
Supplement: d1ra06861j1.pdf [file d1ra06861j1.pdf]

| ID | SMILES                                                         | Split 1 | Split 2 | Split 3 | Split 4 | Exp.   | Prd. 1   | Prd. 2   | Prd. 3   | Prd. 4          |
|----|----------------------------------------------------------------|---------|---------|---------|---------|--------|----------|----------|----------|-----------------|
| 1  | [Cl-]^Cn1cc[nH+]c1                                             | +       | +       | +       | +       | 345.15 | 344.454  | 357.3358 | 338.7871 | 349.263         |
| 2  | [Br-]^Cn1cc[nH+]c1                                             | +       | -       | #       | #       | 314.15 | 321.6739 | 339.5925 | 316.9577 | 337.6344        |
| 3  | Cn1cc[nH+]c1^[O-]Cl(=O)(=O)=O                                  | +       | +       | +       | +       | 430.15 | 359.4713 | 377.0482 | 379.378  | 357.4868        |
| 4  | Cn1cc[nH+]c1^F[B-](F)(F)F                                      | #       | +       | -       | -       | 310.15 | 299.9001 | 319.8652 | 328.2873 | 326.9787        |
| 5  | Cn1cc[nH+]c1^FC(F)(F)S(=O)(=O)NS(=O)(=O)C(F)(F)F               | #       | +       | #       | -       | 282.15 | 281.9808 | 273.4981 | 286.5396 | 280.0366        |
| 6  | Cn1cc[nH+]c1^FC(F)(F)C(F)(F)S(=O)(=O)NS(=O)(=O)C(F)(F)C(F)(F)F | -       | #       | -       | +       | 284.15 | 293.1343 | 291.3098 | 281.5566 | 296.5291        |
| 7  | Cn1cc[nH+]c1^[O-]N(=O)=O                                       | -       | #       | -       | +       | 343.15 | 337.0763 | 341.6925 | 336.1084 | 341.3067        |
| 8  | Cn1cc[nH+]c1^[O-]S(=O)(=O)C(F)(F)F                             | +       | +       | +       | +       | 357.15 | 316.8292 | 331.7675 | 321.1204 | 325.6585        |
| 9  | Cn1cc[nH+]c1^F[P-](F)(F)(F)F                                   | +       | -       | +       | -       | 389.15 | 333.7375 | 329.8861 | 348.9548 | 349.7061        |
| 10 | Cn1cc[nH+]c1^[O-]C(=O)C(F)(F)F                                 | +       | +       | -       | +       | 324.15 | 278.5965 | 292.5118 | 268.891  | 281.9284        |
| 11 | CC(=O)[O-]^Cn1cc[nH+]c1                                        | -       | #       | -       | #       | 250.15 | 272.9482 | 283.3392 | 248.1404 | 281.7608        |
| 12 | [Cl-]^CCn1cc[nH+]c1                                            | +       | #       | +       | #       | 331.15 | 341.6835 | 336.5565 | 327.3342 | 339.6687        |
| 13 | [Br-]^CCn1cc[nH+]c1                                            | -       | -       | *       | #       | 333.15 | 314.0295 | 325.3046 | 333.15   | 320.9809        |
| 14 | CCn1cc[nH+]c1^[O-]Cl(=O)(=O)=O                                 | -       | #       | +       | +       | 294.15 | 340.3314 | 324.2884 | 350.5743 | 334.8429        |
| 15 | CCn1cc[nH+]c1^[O-]N(=O)=O                                      | #       | -       | +       | #       | 304.15 | 325.6153 | 318.7535 | 315.6405 | 327.3142        |
| 16 | CCn1cc[nH+]c1^[O-]S(=O)(=O)C(F)(F)F                            | +       | -       | +       | +       | 281.15 | 297.6893 | 279.0077 | 292.3168 | 303.0146        |
| 17 | [Cl-]^C[n+]1ccn(C)c1                                           | -       | -       | +       | *       | 398.15 | 387.2984 | 387.74   | 396.5541 | 368.4128        |
| 18 | [Br-]^C[n+]1ccn(C)c1                                           | +       | #       | +       | +       | 382.65 | 364.5183 | 369.9967 | 374.7246 | 380.0413        |
| 19 | C[n+]1ccn(C)c1.F[B-](F)(F)F                                    |         |         |         |         | 376.55 | Outlier  |          |          |                 |
| 20 | C[n+]1ccn(C)c1^FC(F)(F)S(=O)(=O)[N-]S(=O)(=O)C(F)(F)F          | +       | -       | #       | +       | 295.15 | 271.3912 | 278.4686 | 287.8038 | 280.0661        |
| 21 | C[n+]1ccn(C)c1^[O-]S(=O)(=O)C(F)(F)F                           | *       | -       | -       | -       | 312.15 | 325.0721 | 313.1679 | 322.0747 | 314.5993        |
| 22 | Cc1ccc(cc1)S(=O)(=O)[O-]^C[n+]2ccn(C)c2                        | *       | +       | *       | -       | 372.6  | 345.9729 | 354.5074 | 342.3696 | 361.7015        |
| 23 | C[n+]1ccn(C)c1^[O-]C(=O)C(F)(F)F                               | -       | -       | -       | +       | 325.15 | 289.3483 | 284.3099 | 278.4154 | 267.1545        |
| 24 | C[n+]1ccn(C)c1^F[B-](F)(F)C(F)(F)F                             | #       | -       | +       | +       | 288.15 | 285.2457 | 278.7856 | 278.0686 | 278.4741        |
| 25 | C[n+]1ccn(C)c1^F[B-](F)(F)C(F)(F)C(F)(F)F                      | #       | *       | -       | *       | 300.15 | 277.6794 | 279.3619 | 272.8494 | <b>286.5918</b> |
| 26 | C[n+]1ccn(C)c1^F[B-](F)(F)C(F)(F)C(F)(F)C(F)(F)F               | #       | -       | -       | *       | 284.15 | 283.8644 | 285.3977 | 291.5086 | <b>283.0363</b> |
| 27 | C[n+]1ccn(C)c1^F[B-](F)(F)C(F)(F)C(F)(F)C(F)(F)C(F)(F)F        | -       | +       | -       | -       | 289.15 | 283.3626 | 284.3397 | 293.256  | 287.4611        |

|    |                                                                                           |   |   |   |   |        |          |          |          |          |
|----|-------------------------------------------------------------------------------------------|---|---|---|---|--------|----------|----------|----------|----------|
| 28 | [Cl-]^Cc1[nH+]ccn1C                                                                       | * | * | + | - | 454.15 | 458.2799 | 437.1076 | 452.2186 | 441.9198 |
| 29 | [Br-]^Cc1[nH+]ccn1C                                                                       | + | * | - | + | 449.15 | 435.4998 | 419.3643 | 430.3892 | 430.2913 |
| 30 | Cc1[nH+]ccn1C^Cl(=O)(=O)=O                                                                | - | - | * | + | 337.15 | 372.6461 | 359.3162 | 387.4290 | 373.945  |
| 31 | Cc1[nH+]ccn1C^FC(F)(F)S(=O)(=O)[N-]S(=O)(=O)C(F)(F)F                                      | - | * | + | + | 295.15 | 328.8891 | 311.3991 | 332.8015 | 317.9951 |
| 32 | Cc1[nH+]ccn1C^FC(F)(F)C(F)(F)S(=O)(=O)[N-]S(=O)(=O)C(F)(F)C(F)(F)F                        | - | - | + | + | 288.15 | 325.087  | 306.7695 | 318.1134 | 318.7034 |
| 33 | Cc1[nH+]ccn1C^O-N(=O)=O                                                                   | - | - | + | - | 357.15 | 369.0798 | 349.9904 | 384.4979 | 366.9082 |
| 34 | Cc1[nH+]ccn1C^O-S(=O)(=O)C(F)(F)F                                                         | + | + | # | - | 392.15 | 367.4497 | 351.6514 | 382.3542 | 373.8762 |
| 35 | Cc1[nH+]ccn1C^F[P-](F)(F)(F)F                                                             | + | - | + | + | 388.15 | 371.5571 | 342.0852 | 365.1983 | 359.4195 |
| 36 | [Cl-]^CC[n+]1ccn(C)c1                                                                     | + | + | - | + | 357.15 | 356.5707 | 335.1658 | 334.9672 | 341.1301 |
| 37 | [Br-]^CC[n+]1ccn(C)c1                                                                     | # | + | - | # | 338.05 | 328.9167 | 323.9139 | 315.2934 | 322.4424 |
| 38 | [I-]^CC[n+]1ccn(C)c1                                                                      | - | - | # | # | 352.15 | 362.8283 | 303.1623 | 338.8677 | 349.6015 |
| 39 | CC[n+]1ccn(C)c1^F[B-](F)(F)F                                                              | - | + | * | - | 287.57 | 285.097  | 288.0383 | 318.0926 | 302.2261 |
| 40 | CCn1cc[n+](C)c1^F[B-](F)(F)C(F)(F)F                                                       | # | - | - | + | 253.15 | 260.295  | 247.0787 | 239.8757 | 259.5588 |
| 41 | CCn1cc[n+](C)c1^F[B-](F)(F)C(F)(F)C(F)(F)F                                                | - | - | - | + | 274.15 | 252.7287 | 247.655  | 234.6565 | 267.6764 |
| 42 | CCn1cc[n+](C)c1^F[B-](F)(F)C(F)(F)C(F)(F)C(F)(F)F                                         | - | + | + | - | 281.15 | 258.9137 | 253.6908 | 253.3157 | 264.121  |
| 43 | CCn1cc[n+](C)c1^F[B-](F)(F)C(F)(F)C(F)(F)C(F)(F)C(F)(F)F                                  | - | + | - | + | 269.15 | 258.412  | 252.6328 | 255.0631 | 268.5457 |
| 44 | CCC[B-](F)(F)F^CCn1cc[n+](C)c1                                                            | - | - | + | + | 259.15 | 255.8166 | 247.5865 | 249.5014 | 268.8584 |
| 45 | CCCC[B-](F)(F)F^CCn1cc[n+](C)c1                                                           | # | - | * | # | 264.15 | 258.3392 | 258.2108 | 253.7070 | 270.8018 |
| 46 | CCCCC[B-](F)(F)F^CCn1cc[n+](C)c1                                                          | - | + | - | - | 289.15 | 256.3089 | 261.7407 | 250.446  | 272.0791 |
| 47 | CCn1cc[n+](C)c1^FC(F)(F)S(=O)(=O)[N-]S(=O)(=O)C(F)(F)F                                    | + | + | + | + | 256.15 | 246.4405 | 246.7617 | 249.6109 | 261.1507 |
| 48 | CCn1cc[n+](C)c1^FC(F)(F)C(F)(F)S(=O)(=O)[N-]S(=O)(=O)C(F)(F)C(F)(F)F                      | * | * | - | * | 272.15 | 257.594  | 264.5733 | 244.6279 | 277.6432 |
| 49 | CCn1cc[n+](C)c1^N#C[N-]C#N                                                                | * | # | - | # | 261.15 | 253.7204 | 255.6346 | 251.4775 | 269.0647 |
| 50 | CCn1cc[n+](C)c1^FC(F)(F)C(=O)[N-]S(=O)(=O)C(F)(F)F                                        | + | # | + | + | 275.75 | 278.1193 | 262.6311 | 249.8484 | 280.3598 |
| 51 | CCn1cc[n+](C)c1^O-N=O                                                                     | + | # | - | - | 328.15 | 294.408  | 281.5915 | 272.5039 | 307.5228 |
| 52 | CCn1cc[n+](C)c1^O-N(=O)=O                                                                 | # | # | + | + | 311.15 | 313.4315 | 311.0502 | 305.9516 | 317.8048 |
| 53 | CCn1cc[n+](C)c1^FC(F)(F)C(F)(F)C(F)(F)C(F)(F)S(=O)(=O)[N-]S(=O)(=O)C(F)(F)C(F)(F)C(F)(F)F | * | * | # | - | 298.15 | 260.7189 | 261.5083 | 280.2248 | 281.252  |
| 54 | CCn1cc[n+](C)c1^FS(=O)(=O)[N-]S(=O)(=O)F                                                  | * | + | - | * | 260.1  | 226.3293 | 256.0471 | 235.9345 | 260.8511 |
| 55 | CCn1cc[n+](C)c1^CCn2cc[n+](C)c2^O-S(=O)(=O)[O-]                                           | + | + | + | - | 343.15 | 336.9883 | 354.0159 | 359.5672 | 322.9162 |



|     |                                                                                                                                                       |   |   |   |   |               |          |          |           |                 |
|-----|-------------------------------------------------------------------------------------------------------------------------------------------------------|---|---|---|---|---------------|----------|----------|-----------|-----------------|
| 83  | CC[n+] <sub>1</sub> ccn(CC)c1^[O-]S(=O)(=O)C(F)(F)F                                                                                                   | # | + | + | # | 296.15        | 306.3158 | 278.5638 | 300.518   | 311.7178        |
| 84  | [Cl-]^CCC[n+] <sub>1</sub> ccn(C)c1                                                                                                                   | - | # | + | - | 333.15        | 349.8508 | 342.9637 | 339.5386  | 342.9389        |
| 85  | CCC[n+] <sub>1</sub> ccn(C)c1^F[B-](F)(F)F                                                                                                            | - | # | * | + | 256.15        | 280.9529 | 284.9577 | 311.9987: | 293.3968        |
| 86  | CCC[n+] <sub>1</sub> ccn(C)c1^F[B-](F)(F)C(F)(F)F                                                                                                     | + | - | * | # | 252.15        | 267.0024 | 258.2847 | 255.7577: | 264.4162        |
| 87  | CCC[n+] <sub>1</sub> ccn(C)c1^F[B-](F)(F)C(F)(F)C(F)(F)F                                                                                              | - | + | # | # | 231.15        | 259.436  | 258.861  | 250.5385  | 272.5338        |
| 88  | CCC[n+] <sub>1</sub> ccn(C)c1^F[B-](F)(F)C(F)(F)C(F)(F)C(F)(F)F                                                                                       | - | - | - | * | 268.15        | 265.6211 | 264.8968 | 269.1977  | <b>268.9784</b> |
| 89  | CCC[n+] <sub>1</sub> ccn(C)c1^F[B-](F)(F)C(F)(F)C(F)(F)C(F)(F)C(F)(F)F                                                                                | * | - | + | * | 261.15        | 265.1193 | 263.8389 | 270.9451  | <b>273.4031</b> |
| 90  | CCC[n+] <sub>1</sub> ccn(C)c1^FC(F)(F)C(F)(F)C(F)(F)C(F)(F)S(=O)(=O)[N-]S(=O)(=O)C(F)(F)C(F)(F)C(F)(F)C(F)(F)F                                        | + | * | + | - | 277.15        | 267.4263 | 272.7143 | 296.1068  | 286.1093        |
| 91  | CCC[n+] <sub>1</sub> ccn(C)c1^[O-]S(=O)(=O)C(F)(F)C(F)(F)C(F)(F)C(F)(F)F                                                                              | - | # | + | * | 306.15        | 281.4971 | 294.2851 | 309.4805  | 304.3381        |
| 92  | CCC[n+] <sub>1</sub> ccn(C)c1^F[P-](F)(F)(F)(F)F                                                                                                      | # | # | # | # | 294.15        | 324.9841 | 306.1411 | 312.9504  | 316.1616        |
| 93  | [I-]^CC(C)[n+] <sub>1</sub> ccn(C)c1                                                                                                                  | # | - | + | - | 387.15        | 397.2428 | 332.5751 | 380.5177  | 375.1068        |
| 94  | CC(C)[n+] <sub>1</sub> ccn(C)c1^FC(F)(F)S(=O)(=O)[N-]S(=O)(=O)C(F)(F)F                                                                                | - | - | * | * | 289.15        | 284.1284 | 289.889  | 285.9447  | <b>283.2413</b> |
| 95  | CC(C)[n+] <sub>1</sub> ccn(C)c1^FC(F)(F)C(F)(F)C(F)(F)C(F)(F)S(=O)(=O)[N-]S(=O)(=O)C(F)(F)C(F)(F)C(F)(F)C(F)(F)F                                      | - | + | * | * | 301.15        | 298.4068 | 304.6356 | 316.5586  | <b>303.3426</b> |
| 96  | CC(C)[n+] <sub>1</sub> ccn(C)c1^[O-]S(=O)(=O)C(F)(F)C(F)(F)C(F)(F)C(F)(F)F                                                                            | - | - | - | + | 298.15        | 312.4776 | 326.2064 | 329.9323  | 321.5714        |
| 97  | CC(C)[n+] <sub>1</sub> ccn(C)c1^F[P-](F)(F)(F)(F)F                                                                                                    | * | + | + | + | 375.15        | 353.5882 | 339.284  | 352.7584  | 326.241         |
| 98  | [Cl-]^COCCn1cc[n+](C)c1                                                                                                                               | * | + | + | # | 338.15        | 327.8881 | 339.6434 | 320.108   | 359.1577        |
| 99  | COCCn1cc[n+](C)c1^F[B-](F)(F)C(F)(F)F                                                                                                                 | # | - | - | - | 275.15        | 265.1931 | 255.9256 | 239.5313  | 274.1513        |
| 100 | COCCn1cc[n+](C)c1^F[B-](F)(F)C(F)(F)C(F)(F)F                                                                                                          | - | * | # | * | 264.15        | 257.6267 | 256.5019 | 234.3121  | <b>282.2689</b> |
| 101 | COCCn1cc[n+](C)c1^[O-]S(=O)(=O)C(F)(F)F                                                                                                               | - | - | * | * | 300.15        | 305.3997 | 287.374  | 286.2432  | <b>290.0432</b> |
| 102 | COCCn1cc[n+](C)c1^F[P-](F)(F)(F)(F)F                                                                                                                  | + | # | - | - | 299.15        | 306.369  | 319.9404 | 295.4176  | 319.5297        |
| 103 | [Cl-]^CCCC[n+] <sub>1</sub> ccn(C)c1                                                                                                                  | + | + | + | - | 314.15        | 337.5032 | 340.0408 | 327.2164  | 341.7281        |
| 104 | [I-].CCCC[n+] <sub>1</sub> ccn(C)c1                                                                                                                   |   |   |   |   | <b>201.15</b> | Outlier  |          |           |                 |
| 105 | CCCC[n+] <sub>1</sub> ccn(C)c1.F[B-](F)(F)F                                                                                                           |   |   |   |   | <b>192.15</b> | Outlier  |          |           |                 |
| 106 | CCCC[n+] <sub>1</sub> ccn(C)c1^FC(F)(F)c2cc(cc(c2)C(F)(F)F)[B-](c3cc(cc(c3)C(F)(F)C(F)(F)F)(c4cc(cc(c4)C(F)(F)F)C(F)(F)F)c5cc(cc(c5)C(F)(F)F)C(F)(F)F | * | - | - | # | 382.15        | 352.9459 | 352.8987 | 357.4812  | 355.668         |
| 107 | CCCC[n+] <sub>1</sub> ccn(C)c1^C[Si](C)(CCC(F)(F)F)c2ccc(cc2)[B-                                                                                      | + | + | - | + | 377.15        | 387.1974 | 398.9636 | 368.6903  | 378.4972        |

|     |                                                                                                                                                                                                                                                  |   |   |   |   |          |          |          |          |          |
|-----|--------------------------------------------------------------------------------------------------------------------------------------------------------------------------------------------------------------------------------------------------|---|---|---|---|----------|----------|----------|----------|----------|
|     | ](c3ccc(cc3)[Si](C)(C)CCC(F)(F)F)(c4ccc(cc4)[Si](C)(C)CCC(F)(F)F)c5ccc(cc5)[Si](C)(C)CCC(F)(F)F                                                                                                                                                  |   |   |   |   |          |          |          |          |          |
| 108 | CCCC[n+]1ccn(C)c1^FC(F)(F)C(F)(F)C(F)(F)C(F)(F)C(F)(F)C(F)(F)C(F)(F)c2ccc(cc2)[B-](c3ccc(cc3)C(F)(F)C(F)(F)C(F)(F)C(F)(F)C(F)(F)C(F)(F)F)(c4ccc(cc4)C(F)(F)C(F)(F)C(F)(F)C(F)(F)C(F)(F)F)c5ccc(cc5)C(F)(F)C(F)(F)C(F)(F)C(F)(F)C(F)(F)C(F)(F)F~: | + | # | - | + | 316.0673 | 47.0827  | 33.7638  | 336.6887 | 365.7086 |
| 109 | CCCC[n+]1ccn(C)c1^F[B-](F)(F)C(F)(F)C(F)(F)F                                                                                                                                                                                                     | - | - | * | - | 231.15   | 256.3075 | 263.9761 | 240.4441 | 271.2383 |
| 110 | CCCC[n+]1ccn(C)c1^CC(CC#N)[B-](F)(F)F                                                                                                                                                                                                            | - | - | # | - | 188.65   | 208.2285 | 210.9042 | 238.3208 | 214.9754 |
| 111 | CCCC[n+]1ccn(C)c1^FC(F)(F)S(=O)(=O)[N-]S(=O)(=O)C(F)(F)F                                                                                                                                                                                         | - | * | # | - | 271.15   | 250.0193 | 263.0828 | 255.3985 | 264.7126 |
| 112 | CCCC[n+]1ccn(C)c1^N#C[N-]C#N                                                                                                                                                                                                                     | + | * | # | + | 267.15   | 257.2992 | 271.9558 | 257.2651 | 272.6266 |
| 113 | CCCC[n+]1ccn(C)c1^FC(F)(F)C(F)(F)C(F)(F)C(F)(F)S(=O)(=O)[N-]S(=O)(=O)C(F)(F)C(F)(F)C(F)(F)C(F)(F)F                                                                                                                                               | + | + | - | # | 298.15   | 264.2978 | 277.8295 | 286.0124 | 284.8138 |
| 114 | CCCC[n+]1ccn(C)c1^[O-]S(=O)(=O)C(F)(F)F                                                                                                                                                                                                          | # | + | * | - | 289.55   | 303.7003 | 297.7822 | 289.6694 | 299.2458 |
| 115 | CCCC[n+]1ccn(C)c1^[O-]S(=O)(=O)C(F)(F)C(F)(F)C(F)(F)C(F)(F)F                                                                                                                                                                                     | * | - | # | - | 293.15   | 278.3686 | 299.4002 | 299.3861 | 303.0426 |
| 116 | CCCCOS(=O)(=O)[O-]^CCCC[n+]1ccn(C)c1                                                                                                                                                                                                             | + | - | # | + | 256.15   | 246.4671 | 254.3391 | 251.1817 | 257.0572 |
| 117 | CCCC[n+]1ccn(C)c1^[O-]S(=O)(=O)OCCCC(F)(F)C(F)(F)F                                                                                                                                                                                               | # | - | # | * | 258.05   | 239.4596 | 260.7205 | 215.6371 | 243.5846 |
| 118 | CCCC[n+]1ccn(C)c1^[O-]S(=O)(=O)OCC(F)(F)C(F)(F)C(F)(F)C(F)(F)F                                                                                                                                                                                   | - | + | - | + | 211.95   | 230.4464 | 240.0646 | 233.5362 | 245.9761 |
| 119 | CCCC[n+]1ccn(C)c1^COS(=O)(=O)[O-]                                                                                                                                                                                                                | + | + | + | # | 253.15   | 252.2536 | 257.8468 | 243.9968 | 264.8137 |
| 120 | CCCC[n+]1ccn(C)c1.F[P-](F)(F)(F)(F)F                                                                                                                                                                                                             |   |   |   |   | 212.15   | Outlier  |          |          |          |
| 121 | CCCC[n+]1ccn(C)c1^[O-]C(=O)C(F)(F)F                                                                                                                                                                                                              | + | # | - | - | 233.15   | 263.6658 | 268.2763 | 264.3272 | 261.5277 |
| 122 | CCCC[n+]1ccn(C)c1^CC(=O)[O-]                                                                                                                                                                                                                     | * | # | # | + | 253.15   | 281.9549 | 284.7494 | 250.0908 | 274.2053 |
| 123 | CCCC[n+]1ccn(C)c1^Cl[Al-](Cl)(Cl)Cl                                                                                                                                                                                                              | + | - | + | # | 263.15   | 318.2596 | 271.9829 | 259.9514 | 276.3123 |
| 124 | CC(C)C[n+]1ccn(C)c1^FC(F)(F)S(=O)(=O)[N-]S(=O)(=O)C(F)(F)F                                                                                                                                                                                       | + | + | + | # | 233.15   | 269.5029 | 255.6983 | 266.3927 | 268.7069 |
| 125 | CC(C)C[n+]1ccn(C)c1^FC(F)(F)C(F)(F)C(F)(F)C(F)(F)S(=O)(=O)[N-]S(=O)(=O)C(F)(F)C(F)(F)C(F)(F)C(F)(F)-+F                                                                                                                                           | - | + | * | - | 277.15   | 283.7814 | 270.4449 | 297.0066 | 288.8082 |
| 126 | CCCC[n+]1ccn(C)c1^FC(F)(F)c2cc(cc-c2)C(F)(F)F[B-](c3+cc(ccc3)C(F)(F)C(F)(F)F)(c4cc(ccc4)C#(F)(F)C(F)(F)F)c5cc(ccc5)C(F)(F)C(F)(F)F                                                                                                               | # | + | + | + | 355.15   | 340.5983 | 349.9757 | 346.5709 | 354.4571 |
| 127 | CCCC[n+]1ccn(C)c1^FC(F)(F)S(=O)(=O)[N-]S(=O)(=O)C(F)(F)F                                                                                                                                                                                         | + | + | + | - | 264.15   | 237.6718 | 260.1599 | 244.4882 | 263.5017 |

|     |                                                                                                                                           |   |   |   |   |               |          |          |          |           |
|-----|-------------------------------------------------------------------------------------------------------------------------------------------|---|---|---|---|---------------|----------|----------|----------|-----------|
| 128 | CCCCC[n+] <sub>1</sub> ccn(C)c1^FC(F)(F)C(F)(F)C(F)(F)C(F)S(=O)(=O)[N-]S(=O)(=O)C(F)(F)C(F)(F)C(F)(F)C(F)(F)F                             | - | - | + | - | 298.15        | 251.9502 | 274.9065 | 275.1021 | 283.6030  |
| 129 | CCCCC[n+] <sub>1</sub> ccn(C)c1^O=C2[N-]S(=O)(=O)c3ccccc23                                                                                | - | + | # | * | 337.15        | 326.7087 | 317.6166 | 317.2346 | 338.3526  |
| 130 | CCCCC[n+] <sub>1</sub> ccn(C)c1^FC(F)(F)C(F)(F)[P-](F)(F)(F)(C(F)(F)C(F)(F)C(F)(F)C(F)(F)C(F)(F)F                                         | * | # | - | - | 223.15        | 216.198  | 199.1484 | 208.0832 | 226.9447  |
| 131 | CCCCC[n+] <sub>1</sub> ccn(CC)c1^FC(F)(F)S(=O)(=O)[N-]S(=O)(=O)C(F)(F)F                                                                   | + | * | * | + | 233.15        | 233.0147 | 242.976  | 239.1485 | 265.8488  |
| 132 | CCCCC[n+] <sub>1</sub> ccn(CC)c1^[O-]S(=O)(=O)C(F)(F)F                                                                                    | - | + | - | - | 275.15        | 286.6956 | 277.6753 | 273.4194 | 300.3821  |
| 133 | CCCCC[n+] <sub>1</sub> ccn(CC)c1^[O-]S(=O)(=O)C(F)(F)C(F)(F)C(F)(F)C(F)(F)F                                                               | + | * | + | # | 294.15        | 261.3639 | 279.2934 | 283.1361 | 304.1789  |
| 134 | CCCCC[n+] <sub>1</sub> ccn(CC)c1^[O-]C(=O)C(F)(F)F                                                                                        | # | + | + | - | 233.15        | 243.0772 | 245.4629 | 239.832  | 253.6557  |
| 135 | [Br-]^CCCC[n+] <sub>1</sub> ccn(C=C)c1                                                                                                    | # | + | + | - | 356.15        | 301.0684 | 327.0023 | 335.3442 | 326.381   |
| 136 | [Cl-].CCCCCn1cc[n+](C)c1                                                                                                                  |   |   |   |   | <b>198.15</b> | Outlier  |          |          |           |
| 137 | CCCCCn1cc[n+](C)c1.F[B-](F)(F)F                                                                                                           |   |   |   |   | <b>191.15</b> | Outlier  |          |          |           |
| 138 | CCCCCn1cc[n+](C)c1^FC(F)(F)c2cc(cc(c2)C(F)(F)F)[B-](c3cc(cc(c3)C(F)(F)C(F)(F)F)(c4cc(cc(c4)C(F)(F)C(F)(F)F)c5cc(cc(c5)C(F)(F)F)C(F)(F)F   | + | + | - | # | 355.15        | 332.7621 | 338.3137 | 326.5788 | 342.3127  |
| 139 | CCCCCn1cc[n+](C)c1^F[B-](F)(F)C(F)(F)C(F)(F)F                                                                                             | # | - | # | + | 263.15        | 236.1237 | 249.3911 | 209.5417 | 257.883   |
| 140 | CCCCCn1cc[n+](C)c1^FC(F)(F)S(=O)(=O)[N-]S(=O)(=O)C(F)(F)F                                                                                 |   | - | - | # | 266.00        | 229.8355 | 248.4978 | 224.4961 | 251.3573  |
| 141 | CCCCCn1cc[n+](C)c1^[O-]S(=O)(=O)C(F)(F)F                                                                                                  | - | - | - | * | 302.15        | 283.5164 | 283.1972 | 258.767  | 285.89.05 |
| 142 | CCCCCn1cc[n+](C)c1^F[P-](F)(F)(F)F                                                                                                        | + | + | - | + | 212.15        | 301.6717 | 296.6713 | 271.9535 | 301.5108  |
| 143 | CCCCCn1cc[n+](C)c1^FC(F)(F)C(F)(F)[P-](F)(F)(F)(C(F)(F)C(F)(F)C(F)(F)C(F)(F)C(F)(F)F                                                      | + | + | # | # | 223.15        | 208.3617 | 187.4864 | 188.0912 | 214.8003  |
| 144 | [Br-]^Cn1cc[n+](CC(=O)c2ccccc2)c1                                                                                                         | # | # | + | * | 322.15        | 347.4291 | 332.4208 | 332.6466 | 349.3296  |
| 145 | C^CCCCCn1cc[n+](C)c1^FC(F)(F)c2cc(cc(c2)C(F)(F)F)[B-](c3cc(cc(c3)C(F)(F)C(F)(F)F)(c4cc(cc(c4)C(F)(F)C(F)(F)F)c5cc(cc(c5)C(F)(F)F)C(F)(F)F | * | - | - | + | 342.15        | 342.3.79 | 340.6063 | 347.4855 | 333.8753  |
| 146 | CCCCCn1cc[n+](C)c1^FC(F)(F)S(=O)(=O)[N-]S(=O)(=O)C(F)(F)F                                                                                 | - | + | * | - | 280.15        | 232.8507 | 251.1225 | 226.4800 | 252.8996  |
| 147 | [Cl-]^CCCC[n+] <sub>1</sub> ccn(CCCC)c1                                                                                                   | # | - | # | + | 328.15        | 320.2623 | 301.0881 | 282.3356 | 314.1461  |
| 148 | [Br-]^C[n+] <sub>1</sub> ccn(Cc2ccccc2)c1                                                                                                 | # | # | # | + | 399.15        | 404.0049 | 415.1495 | 389.748  | 416.0577  |
| 149 | C[n+] <sub>1</sub> ccn(Cc2ccccc2)c1.[O-]S(=O)(=O)C(F)(F)F                                                                                 |   |   |   |   | <b>300.15</b> | Outlier  |          |          |           |

|     |                                                                                                                                                                |   |   |   |   |               |          |          |          |                 |
|-----|----------------------------------------------------------------------------------------------------------------------------------------------------------------|---|---|---|---|---------------|----------|----------|----------|-----------------|
| 150 | C[n+] <sub>1</sub> ccn(Cc2cccc2)c1^F[P-](F)(F)(F)F                                                                                                             | - | * | # | - | 403.15        | 381.1002 | 390.4904 | 382.1009 | 378.3363        |
| 151 | COc1ccc(Cn2cc[n+](C)c2)cc1^[O-]S(=O)(=O)C(F)(F)F                                                                                                               | - | - | - | + | 318.15        | 326.8112 | 297.2003 | 306.0243 | 324.3893        |
| 152 | [Cl-].CCCCCCCCn1cc[n+](C)c1                                                                                                                                    |   |   |   |   | <b>191.15</b> | Outlier  |          |          |                 |
| 153 | CCCCCCCCn1cc[n+](C)c1.F[B-](F)(F)F                                                                                                                             |   |   |   |   | <b>193.15</b> | Outlier  |          |          |                 |
| 154 | CCCCCCCCn1cc[n+](C)c1^FC(F)(F)c2cc(cc(c2)C(F)(F)F)[B-](c3cc(cc(c3)C(F)(F)F)C(F)(F)F)(c4cc(cc(c4)C(F)(F)F)C(F)(F)F)c5cc(cc(c5)C(F)(F)F)C(F)(F)F                 | + | - | * | + | 348.15        | 338.7925 | 343.563  | 330.5467 | 345.3973        |
| 155 | CCCCCCCCn1cc[n+](C)c1.F[P-](F)(F)(F)F                                                                                                                          |   |   |   |   | <b>198.15</b> | Outlier  |          |          |                 |
| 156 | C[n+] <sub>1</sub> ccn(Cc2cccc2)c1^FC(F)(F)S(=O)(=O)[N-]S(=O)(=O)C(F)(F)F                                                                                      | + | # | * | * | 310.15        | 304.0629 | 320.2758 | 327.7324 | 314.6667        |
| 157 | C[n+] <sub>1</sub> ccn(Cc2cccc2)c1^F[P-](F)(F)(F)F                                                                                                             | - | + | # | + | 376.15        | 375.8991 | 368.4492 | 375.1898 | 364.8202        |
| 158 | CCCCCCCCn1cc[n+](C)c1^F[P-](F)(F)(F)F                                                                                                                          | * | - | * | - | 310.15        | 293.9561 | 316.6027 | 288.3345 | 315.4198        |
| 159 | CCC[n+] <sub>1</sub> ccn(CC(=O)c2cccc2)c1.F[B-](F)(F)F                                                                                                         |   |   |   |   | <b>422.15</b> | Outlier  |          |          |                 |
| 160 | CCCCOCn1cc[n+](COCCC)c1^F[P-](F)(F)(F)F                                                                                                                        | + | - | # | - | 320.15        | 282.4933 | 286.4184 | 278.4782 | 298.829         |
| 161 | CCCCCCCC[n+] <sub>1</sub> ccn(C)c1^F[P-](F)(F)(F)F                                                                                                             | # | - | - | - | 287.15        | 321.5688 | 318.832  | 299.8813 | 319.8244        |
| 162 | CCCCCCCC[n+] <sub>1</sub> ccn(CC)c1^C2ccc(cc2)S(=O)(=O)[O-]                                                                                                    | + | + | # | + | 343.15        | 336.5199 | 310.9473 | 335.5736 | 347.5279        |
| 163 | CCCCCCCC[n+] <sub>1</sub> ccn(CC)c1.F[P-](F)(F)(F)F                                                                                                            |   |   |   |   | <b>223.15</b> | Outlier  |          |          |                 |
| 164 | Cn1cc[n+](CCc2cccc2)c1^FC(F)(F)S(=O)(=O)[N-]S(=O)(=O)C(F)(F)F                                                                                                  | + | + | + | + | 321.15        | 289.0612 | 303.1116 | 305.9023 | 302.6142        |
| 165 | Cn1cc[n+](CCc2cccc2)c1^F[P-](F)(F)(F)F                                                                                                                         | - | + | + | + | 325.15        | 360.8974 | 351.2851 | 353.3597 | 352.7676        |
| 166 | CCCCOC[n+] <sub>1</sub> ccn(COCCC)c1^F[P-](F)(F)(F)F                                                                                                           | - | + | # | - | 330.15        | 324.5665 | 300.6241 | 321.4469 | 326.6597        |
| 167 | CCCCCCCC[n+] <sub>1</sub> ccn(CCC)c1^F[P-](F)(F)(F)F                                                                                                           | + | + | + | - | 243.15        | 307.3759 | 297.1644 | 305.82   | 304.646         |
| 168 | [Cl-]^CCCCCCCCC[n+] <sub>1</sub> ccn(C)c1                                                                                                                      | + | + | # | - | 311.17        | 345.6734 | 328.4614 | 334.8949 | 341.9252        |
| 169 | CCCCCCCCC[n+] <sub>1</sub> ccn(C)c1.F[B-](F)(F)F                                                                                                               |   |   |   |   | <b>195.65</b> | Outlier  |          |          |                 |
| 170 | C^CCCCCCCCC[n+] <sub>1</sub> ccn(C)c1^FC(F)(F)c2cc(cc(c2)C(F)(F)F)[B-](c3cc(cc(c3)C(F)(F)F)C(F)(F)F)(c4cc(cc(c4)C(F)(F)F)C(F)(F)F)c5cc(cc(c5)C(F)(F)F)C(F)(F)F | + | * | + | + | 358.15        | 362.205  | 362.767  | 375.4133 | 352.1889        |
| 171 | CCCCCCCCC[n+] <sub>1</sub> ccn(C)c1^FC(F)(F)S(=O)(=O)[N-]S(=O)(=O)C(F)(F)F                                                                                     | # | * | # | + | 244.15        | 252.7478 | 273.2833 | 254.4078 | 271.2132        |
| 172 | CCCCCCCCC[n+] <sub>1</sub> ccn(C)c1^C2ccc(cc2)S(=O)(=O)[O-]                                                                                                    | # | - | + | - | 352.14        | 350.7914 | 336.0872 | 353.1264 | 357.2736        |
| 173 | CCCCCCCCC[n+] <sub>1</sub> ccn(C)c1^F[P-](F)(F)(F)F                                                                                                            | + | + | - | * | 305.15        | 324.5841 | 321.4567 | 301.8652 | <b>321.3666</b> |
| 174 | CCCCCCCCC[n+] <sub>1</sub> ccn(C)c1^F[B-](F)(F)F                                                                                                               | - | - | + | * | 294.55        | 283.568  | 302.8979 | 302.8975 | <b>300.1442</b> |

|     |                                                                                                                                                    |   |   |   |   |        |          |          |          |          |
|-----|----------------------------------------------------------------------------------------------------------------------------------------------------|---|---|---|---|--------|----------|----------|----------|----------|
| 175 | [Cl-]^CCCCCCCCCCCC[n+]1ccn(C)c1                                                                                                                    | - | + | + | # | 369.78 | 345.9395 | 328.1006 | 338.8627 | 342.1949 |
| 176 | [Br-]^CCCCCCCCCCCC[n+]1ccn(C)c1                                                                                                                    | + | - | + | - | 267.85 | 318.2856 | 316.8487 | 319.1889 | 323.5071 |
| 177 | CCCCCCCCCCCC[n+]1ccn(C)c1^F[B-](F)(F)F                                                                                                             | - | - | + | - | 312.15 | 286.5833 | 305.5226 | 304.8814 | 301.6864 |
| 178 | CCCCCCCCCCCC[n+]1ccn(C)c1^FC(F)(F)S(=O)(=O)[N-]S(=O)(=O)C(F)(F)F                                                                                   | - | - | # | + | 289.85 | 258.7783 | 278.5326 | 258.3756 | 274.2977 |
| 179 | CCCCCCCCCCCC[n+]1ccn(C)c1^F[O-]S(=O)(=O)C(F)(F)F                                                                                                   | - | - | # | + | 312.85 | 312.4592 | 313.232  | 292.6465 | 308.831  |
| 180 | CCCCCCCCCCCC[n+]1ccn(C)c1^F[P-](F)(F)(F)F                                                                                                          | + | + | - | * | 323.15 | 330.6145 | 326.7061 | 305.8331 | 324.4512 |
| 181 | CCCCCCCCCCCC[n+]1ccn(C)c1^FC(F)(F)c2cc(cc(c2)C(F)(F)F)[B-](c3cc(cc(c3)C(F)(F)F)C(F)(F)F)(c4cc(cc(c4)C(F)(F)F)C(F)(F)F)c5cc(cc(c5)C(F)(F)F)C(F)(F)F | + | + | + | - | 345.15 | 361.7048 | 368.3485 | 360.4584 | 365.2531 |
| 182 | CCCCCCCCCCCC[n+]1ccn(C)c1^F[B-](F)F                                                                                                                | * | - | - | + | 322.15 | 289.5985 | 308.1473 | 306.8653 | 303.2287 |
| 183 | [Cl-]^CCCCCCCCCCCCCCCC[n+]1ccn(C)c1                                                                                                                | + | + | + | # | 292.55 | 346.2057 | 327.7399 | 342.8305 | 342.4646 |
| 184 | [Br-]^CCCCCCCCCCCCCCCC[n+]1ccn(C)c1                                                                                                                | - | * | + | * | 293.95 | 318.5517 | 316.488  | 323.1567 | 323.7768 |
| 185 | CCCCCCCCCCCCCCCC[n+]1ccn(C)c1^F[B-](F)(F)F                                                                                                         | + | + | + | - | 315.15 | 292.6137 | 310.772  | 308.8492 | 304.771  |
| 186 | CCCCCCCCCCCCCCCC[n+]1ccn(C)c1^FC(F)(F)S(=O)(=O)[N-]S(=O)(=O)C(F)(F)F                                                                               | + | - | + | + | 307.45 | 264.8087 | 283.782  | 262.3435 | 277.3823 |
| 187 | CCCCCCCCCCCCCCCC[n+]1ccn(C)c1^F[O-]S(=O)(=O)C(F)(F)F                                                                                               | + | + | - | - | 323.15 | 318.4896 | 318.4813 | 296.6143 | 311.9156 |
| 188 | CCCCCCCCCCCCCCCC[n+]1ccn(C)c1^F[P-](F)(F)F                                                                                                         |   | * | - | + | 347.15 | 336.6449 | 331.9554 | 309.8009 | 327.5358 |
| 189 | CCCCCCCCCCCCCCCC[n+]1ccn(C)c1^F[B-](F)(F)F                                                                                                         | + | + | * | - | 328.35 | 295.6289 | 313.3967 | 310.8331 | 306.3133 |
| 190 | [Cl-]^CCCCCCCCCCCCCCCC[n+]1ccn(C)c1                                                                                                                | * | # | - | # | 315.15 | 373.6858 | 327.3792 | 346.7984 | 342.7343 |
| 191 | [Br-]^CCCCCCCCCCCCCCCC[n+]1ccn(C)c1                                                                                                                | - | * | + | + | 313.35 | 318.8178 | 360.285  | 327.1246 | 324.0465 |
| 192 | CCCCCCCCCCCCCCCC[n+]1ccn(C)c1^F[B-](F)(F)F                                                                                                         | * | # | - | - | 322.15 | 298.6441 | 316.0213 | 312.8171 | 307.8556 |
| 193 | CCCCCCCCCCCCCCCC[n+]1ccn(C)c1^FC(F)(F)S(=O)(=O)[N-]S(=O)(=O)C(F)(F)F                                                                               | + | - | # | # | 315.25 | 270.8391 | 289.0314 | 266.3113 | 280.4669 |
| 194 | CCCCCCCCCCCCCCCC[n+]1ccn(C)c1^F[O-]S(=O)(=O)C(F)(F)F                                                                                               | - | * | + | # | 331.25 | 324.52   | 323.7307 | 300.5822 | 315.0001 |
| 195 | CCCCCCCCCCCCCCCC[n+]1ccn(C)c1^F[P-](F)(F)(F)F                                                                                                      | # | * | - | # | 348.15 | 342.6753 | 337.2048 | 313.7688 | 330.6204 |
| 196 | [Cl-]^CCCCCCCCCCCCCCCC[n+]1ccn(C)c1                                                                                                                | - | * | - | + | 348.15 | 346.738  | 376.7863 | 350.7662 | 343.004  |
| 197 | CCCCCCCCCCCCCCCC[n+]1ccn(C)c1^F[B-](F)(F)F                                                                                                         | + | + | + | # | 339.95 | 304.6745 | 321.2707 | 316.7849 | 310.9402 |
| 198 | CCCCCCCCCCCCCCCC[n+]1ccn(C)c1^FC(F)(F)S(=O)(=O)[N-]S(=O)(=O)C(F)(F)F                                                                               | * | * | - | - | 317.95 | 276.8695 | 294.2807 | 270.2792 | 283.5515 |
| 199 | CCCCCCCCCCCCCCCC[n+]1ccn(C)c1^F[O-]S(=O)(=O)C(F)(F)F                                                                                               | # | # | - | - | 339.15 | 330.5504 | 328.98   | 304.55   | 318.0847 |



|     |                                                                                                       |   |   |   |   |        |          |          |          |                 |
|-----|-------------------------------------------------------------------------------------------------------|---|---|---|---|--------|----------|----------|----------|-----------------|
| 200 | CCCCCCCCCCCCCCCC[n+] <sub>1</sub> ccn(C)c1^F[P-](F)(F)(F)F                                            | * | # | * | + | 353.15 | 348.7057 | 342.4541 | 317.7366 | 333.705         |
| 201 | [Br-]^CCCCCCCCCCCCCCCC[n+] <sub>1</sub> ccn(C)c1                                                      | * | - | + | + | 333.35 | 319.3501 | 315.4058 | 335.0603 | 324.5859        |
| 202 | [Cl-]^COCn1cc[n+](C)c1                                                                                | - | + | - | * | 290.15 | 323.0908 | 330.5113 | 332.3464 | <b>355.3531</b> |
| 203 | COCn1cc[n+](C)c1^F[B-](F)(F)C(F)(F)F                                                                  | + | # | * | * | 290.15 | 262.2469 | 264.5021 | 237.1719 | <b>281.3568</b> |
| 204 | COCn1cc[n+](C)c1^F[B-](F)(F)C(F)(F)CC(F)(F)F                                                          | # | * | - | # | 252.15 | 270.3509 | 280.4052 | 250.0608 | 278.2695        |
| 205 | [I-]^C[N]1=C[NH+](C=C1)C(F)(F)C(F)F                                                                   | - | - | - | - | 413.15 | 400.8167 | 363.2319 | 384.7078 | 377.4028        |
| 206 | C[N]1=C[NH+](C=C1)C(F)(F)C(F)F^F[B-](F)(F)F                                                           | # | - | * | - | 337.15 | 316.5185 | 335.9633 | 345.3083 | 327.3271        |
| 207 | C[N]1=C[NH+](C=C1)C(F)(F)C(F)F^FC(F)(F)S(=O)(=O)[N-]S(=O)(=O)C(F)(F)F                                 | - | + | + | + | 314.15 | 291.5222 | 302.4346 | 290.9669 | 314.5053        |
| 208 | [I-]^CC[N]1=C[NH+](C=C1)C(F)(F)C(F)F                                                                  | * | - | - | # | 363.15 | 377.4349 | 340.1042 | 350.2038 | 372.5286        |
| 209 | #:CC[N]1=C[NH+](C=C1)C(F)(F)C(F)F^F[B-](F)(F)F                                                        | # | # | + | + | 298.15 | 314.2347 | 329.9743 | 323.7266 | 304.79          |
| 210 | CC[N]1=C[NH+](C=C1)C(F)(F)C(F)F^FC(F)(F)S(=O)(=O)[N-]S(=O)(=O)C(F)(F)F                                | - | + | - | + | 288.15 | 289.2383 | 296.4455 | 269.3852 | 291.9682        |
| 211 | [I-]^CCCC[N]1=C[NH+](C=C1)C(F)(F)C(F)F                                                                | + | - | - | + | 350.15 | 370.7151 | 347.9021 | 356.1871 | 374.3373        |
| 212 | [I-]^CCCC[N]1=C[NH+](C=C1)C(F)(F)C(F)F                                                                | - | - | * | # | 346.15 | 358.3675 | 344.9792 | 326.2523 | 373.1265        |
| 213 | CCOC(=O)[C@@H](C)[NH+] <sub>1</sub> C=C[N](=C1)C^FC(F)(F)S(=O)(=O)[N-]S(=O)(=O)C(F)(F)F               | - | - | # | - | 318.15 | 298.089  | 308.3921 | 280.8362 | 310.5945        |
| 214 | CCOC(=O)[C@@H](C)[NH+] <sub>1</sub> C=C[N](=C1)C^[O-]S(=O)(=O)C(F)(F)F                                | * | - | - | # | 346.15 | 341.5871 | 332.7003 | 355.5708 | 347.0086        |
| 215 | CCCCCCCCCOC[n+] <sub>1</sub> ccn(COCCCCCCC)c1^F[B-](F)(F)F                                            | - | * | - | + | 326.15 | 323.8392 | 283.0581 | 318.3166 | 329.7541        |
| 216 | CCCCCCCCCOC[n+] <sub>1</sub> ccn(COCCCCCCC)c1^F[B-](F)(F)F                                            | - | # | + | - | 328.15 | 329.8696 | 288.3075 | 322.2845 | 332.8387        |
| 217 | CCCCCCCCCOC[n+] <sub>1</sub> ccn(COCCCCCCC)c1^F[B-](F)(F)F                                            | - | * | * | - | 340.15 | 335.9    | 293.5569 | 326.2523 | 335.9233        |
| 218 | CCCCCCCCCOC[n+] <sub>1</sub> ccn(COCCCCCCC)c1^F[B-](F)(F)F                                            | + | # | # | + | 343.15 | 341.9305 | 298.8062 | 330.2202 | 339.0079        |
| 219 | CCCCCCCCCOC[n+] <sub>1</sub> ccn(COCCCCCCC)c1^F[B-](F)(F)F                                            | # | * | - | * | 351.15 | 347.9609 | 304.0556 | 334.188  | 342.0924        |
| 220 | [Cl-]^C[NH+] <sub>1</sub> C=C[N](=C1)CCO                                                              | - | + | # | - | 333.95 | 359.762  | 329.5942 | 333.0218 | 342.2985        |
| 221 | C[NH+] <sub>1</sub> C=C[N](=C1)CCO^F[P-](F)(F)(F)F                                                    | + | - | + | + | 296.15 | 321.7014 | 314.0215 | 298.731  | 313.2133        |
| 222 | COC(=O)C[n+] <sub>1</sub> ccn(C)c1^FC(F)(F)S(=O)(=O)[N-]S(=O)(=O)C(F)(F)F                             | + | + | - | + | 230.65 | 297.1413 | 286.43   | 270.2397 | 291.1305        |
| 223 | COC(=O)C[n+] <sub>1</sub> ccn(C)c1^F[P-](F)(F)(F)F                                                    | + | + | # | + | 349.15 | 348.0448 | 333.7009 | 297.1233 | 330.61          |
| 224 | CCC(C)Cn1cc[n+](C)c1^FC(F)(F)C(F)(F)C(F)(F)C(F)(F)S(=O)(=O)[N-]S(=O)(=O)C(F)(F)C(F)(F)C(F)(F)C(F)(F)F | - | - | - | - | 227.15 | 278.6504 | 273.8998 | 294.0859 | 272.5024        |
| 225 | CCC(C)Cn1cc[n+](C)c1^[O-]S(=O)(=O)C(F)(F)C(F)(F)C(F)(F)C(F)(F)F                                       | * | # | + | * | 315.15 | 292.7212 | 295.4706 | 307.4596 | 290.7312        |

|     |                                                                                                       |   |   |   |   |               |          |          |          |          |
|-----|-------------------------------------------------------------------------------------------------------|---|---|---|---|---------------|----------|----------|----------|----------|
| 226 | CC(C)CCn1cc[n+](C)c1^FC(F)(F)C(F)(F)C(F)(F)C(F)(F)S(=O)(=O)[N-]S(=O)(=O)C(F)(F)C(F)(F)C(F)(F)C(F)(F)F | - | - | + | + | 312.15        | 265.7357 | 263.8446 | 266.6579 | 286.8568 |
| 227 | [I-]^C[n+]1ccn(CCO[Si](C)(C)C)c1                                                                      | + | - | - | + | 342.15        | 384.9122 | 375.9919 | 370.436  | 368.3959 |
| 228 | [Br-]^C[n+]1ccn(CCO[Si](C)(C)C)c1                                                                     | - | + | # | - | 399.15        | 376.8406 | 388.3894 | 345.8682 | 383.8699 |
| 229 | [I-]^C[Si](C)(C)OCCn1cc[n+](CCC(F)(F)F)c1                                                             | + | - | + | + | 406.15        | 364.2915 | 361.6372 | 393.4866 | 401.2041 |
| 230 | CCOCCn1cc[n+](CCC(F)(F)F)c1.FC(F)(F)S(=O)(=O)[N-]S(=O)(=O)C(F)(F)F                                    |   |   |   |   | <b>401.15</b> | Outlier  |          |          |          |
| 231 | C[n+]1ccn(Cc2ccccc2[Cr](C=O)(C=O)C=O)c1^FC(F)(F)S(=O)(=O)[N-]S(=O)(=O)C(F)(F)F                        | - | + | - | # | 311.15        | 315.6296 | 297.1595 | 309.3436 | 322.1923 |
| 232 | C[n+]1ccn(CC#N)c1^F[B-](F)(F)F                                                                        | - | - | + | + | 308.15        | 264.441  | 251.655  | 275.6674 | 264.532  |
| 233 | C[n+]1ccn(CC#N)c1^F[P-](F)(F)(F)F                                                                     | # | + | + | # | 351.15        | 308.6751 | 342.4443 | 357.2196 | 311.3587 |
| 234 | [Cl-]^C[n+]1ccn(CCC#N)c1                                                                              | + | * | - | + | 323.15        | 354.5944 | 329.1794 | 344.0269 | 330.4205 |
| 235 | C[n+]1ccn(CCC#N)c1^F[B-](F)(F)F                                                                       | + | - | + | + | 293.15        | 261.3125 | 256.7702 | 265.5729 | 263.2365 |
| 236 | C[n+]1ccn(CCC#N)c1^F[P-](F)(F)(F)F                                                                    | - | # | * | + | 308.15        | 305.5466 | 347.5595 | 347.1252 | 310.0631 |
| 237 | [Cl-]^C[n+]1ccn(CCCC#N)c1                                                                             | + | * | + | + | 353.15        | 339.3647 | 326.2564 | 333.1166 | 327.8022 |
| 238 | C[n+]1ccn(CCCC#N)c1^F[B-](F)(F)F                                                                      | - | + | + | - | 201.25        | 248.9649 | 253.8472 | 254.6626 | 262.0256 |
| 239 | CC(CC#N)[B-](F)(F)F^C[n+]1ccn(CCCC#N)c1                                                               | * | - | + | # | 196.55        | 204.1224 | 199.8155 | 191.8809 | 209.0723 |
| 240 | C[n+]1ccn(CCCC#N)c1^F[P-](F)(F)(F)F                                                                   | # | + | - | # | 348.15        | 293.199  | 344.6365 | 336.2149 | 308.8523 |
| 241 | [Cl-]^C[n+]1ccn(CCCCC#N)c1                                                                            | - | # | * | # | 305.15        | 339.4978 | 315.3289 | 335.1005 | 327.937  |
| 242 | C[n+]1ccn(CCCCC#N)c1^F[B-](F)(F)F                                                                     | + | + | + | - | 201.25        | 251.9801 | 256.4719 | 256.6466 | 263.5679 |
| 243 | C[n+]1ccn(CCCCC#N)c1.F[P-](F)(F)(F)F                                                                  |   |   |   |   | <b>212.85</b> | Outlier  |          |          |          |
| 244 | CCCCn1cc[n+](CCP(=O)(OCC)OCC)c1^F[B-](F)(F)F                                                          | + | - | * | + | 192.65        | 189.1204 | 187.7107 | 171.4218 | 202.0669 |
| 245 | CCCCn1cc[n+](CCP(=O)(OCC)OCC)c1^F[P-](F)(F)(F)F<br>187.4124                                           | * | * | - | # | 222.95        | 218.6578 | 206.5105 | 199.2273 | 210.5509 |
| 246 | CCn1cc[n+](CCCP(=O)(OC)OCC)c1^F[B-](F)(F)F                                                            | + | # | * | - | 208.85        | 194.8551 | 191.334  | 236.2249 | 217.6214 |
| 247 | CCn1cc[n+](CCCP(=O)(OC)OCC)c1^F[P-](F)(F)(F)F                                                         | - | - | * | + | 220.65        | 224.3925 | 210.1338 | 264.0305 | 226.1055 |
| 248 | CCCCCn1cc[n+](CCP(=O)(OCC)OCC)c1^F[B-](F)(F)F                                                         | # | * | - | * | 190.55        | 179.788  | 187.4124 | 162.4954 | 202.3983 |
| 249 | CCCCCn1cc[n+](CCP(=O)(OCC)OCC)c1^F[P-](F)(F)(F)F                                                      | * | + | - | # | 210.85        | 209.3255 | 206.2122 | 190.3009 | 210.8824 |
| 250 | CCCCCn1cc[n+](CCCP(=O)(OCC)OCC)c1^F[B-](F)(F)F                                                        | + | * | - | + | 197.65        | 164.7298 | 176.1969 | 171.2192 | 196.8412 |
| 251 | CCCCCn1cc[n+](CCCP(=O)(OCC)OCC)c1^F[P-](F)(F)(F)F                                                     | # | + | # | + | 206.95        | 194.2673 | 194.9967 | 199.0247 | 205.3252 |

|     |                                                                                               |   |   |   |    |        |                      |          |          |          |
|-----|-----------------------------------------------------------------------------------------------|---|---|---|----|--------|----------------------|----------|----------|----------|
| 252 | CCCCCCCn1cc[n+](CCP(=O)(OCC)OC)C)c1^F[B-](F)(F)F                                              | - | # | - | #  | 193.35 | 185.8185             | 192.6617 | 166.4633 | 205.4829 |
| 253 | CCCCCCCn1cc[n+](CCP(=O)(OCC)OC)C)c1^F[P-](F)(F)(F)F                                           | + | - | * | *  | 208.95 | 215.3559             | 211.4616 | 194.2688 | 213.9670 |
| 254 | CCCCCCCn1cc[n+](CCCP(=O)(OCC)OC)C)c1^F[B-](F)(F)F                                             | - | - | * | #  | 208.65 | 170.7602             | 181.4463 | 175.1870 | 199.9258 |
| 255 | CCCCCCCn1cc[n+](CCCP(=O)(OCC)OC)C)c1^F[P-](F)(F)(F)F                                          | + | + | + | -  | 180.65 | 200.2977             | 200.2461 | 202.9926 | 208.4098 |
| 256 | C[n+]1ccn(CCC(F)(F)C(F)(F)S(F)(F)(F)F)F)c1^FC(F)(F)S(=O)(=O)[N-]S(=O)(=O)C(F)(F)F             | # | * | - | -  | 217.65 | 227.829              | 246.2365 | 202.5411 | 236.8359 |
| 257 | C[n+]1ccn(CCC(F)(F)C(F)(F)S(F)(F)(F)F)F)c1^FC(F)(F)S(=O)(=O)[N-]S(=O)(=O)C(F)(F)F             | + | + | - | -  | 216.45 | 210.6204             | 231.1087 | 197.846  | 231.2906 |
| 258 | C[n+]1ccn(CCC(F)(F)C(F)(F)C(F)(F)C(F)(F)S(F)(F)(F)F)c1^FC(F)(F)S(=O)(=O)[N-]S(=O)(=O)C(F)(F)F | + | - | * | -  | 223.15 | 219.5577             | 236.0866 | 234.8897 | 229.4563 |
| 259 | C[n+]1ccn(CCCSC(=S)N(c2cccc2)c3ccc3)c1^F[P-](F)(F)(F)F                                        | - | # | - | -  | 326.15 | 350.4469             | 355.7799 | 327.7083 | 332.0974 |
| 260 | C[n+]1ccn(CCCSC(=S)N2CCOCC2)c1^F[P-](F)(F)(F)F                                                | + | + | + | #  | 323.15 | 338.027              | 342.0708 | 328.7385 | 354.8025 |
| 261 | C[n+]1ccn(CCCSC(=S)[N]2=CC=CC=C2)c1^F[P-](F)(F)(F)F                                           | + | + | - | +  | 409.15 | 368.3583             | 404.3382 | 400.4231 | 408.4817 |
| 262 | C[n+]1ccn(CCCSC(=S)n2ccnc2)c1^F[P-](F)(F)(F)F                                                 | - | - | + | -  | 397.15 | 380.7159             | 351.4657 | 381.0373 | 384.5667 |
| 263 | C[n+]1ccn(CCCBr)c1^F[P-](F)(F)(F)F                                                            | * | # | - | +  | 318.15 | 347.1549             | 339.1284 | 325.8133 | 326.4561 |
| 264 | [Cl-]^CCCC[n+]1ccn(CC(C)O)c1                                                                  | - | - | - | +  | 409.65 | 357.8307             | 354.1434 | 366.2424 | 380.5664 |
| 265 | CCCCNC(=O)Cn1cc[n+](C)c1^F[P-](F)(F)(F)F                                                      | + | - | - | +  | 337.15 | 328.8838             | 316.3748 | 294.6634 | 330.1076 |
| 266 | CCCCN(C)C(=O)Cn1cc[n+](C)c1^F[P-](F)(F)(F)F                                                   | + | + | * | *  | 335.15 | 322.8845             | 338.5646 | 330.6583 | 309.4347 |
| 267 | [Br-]^CCN(CC)C(=O)Cn1cc[n+](C)c1                                                              | - | # | + | -  | 339.15 | 340.9681             | 309.4338 | 336.3574 | 306.7862 |
| 268 | CCN(CC)C(=O)Cn1cc[n+](C)c1^FC(F)(F)S(=O)(=O)[N-]S(=O)(=O)C(F)(F)F                             | # | # | - | ** | 316.15 | 280.8924             | 284.3222 | 281.1725 | 277.044  |
| 269 | CCN(CC)C(=O)Cn1cc[n+](C)c1^F[P-](F)(F)(F)F                                                    | - | - | + | *  | 337.15 | 322.8793             | 309.8241 | 318.6953 | 303.4517 |
| 270 | CC(CC#N)[B-](F)(F)F^Cn1cc[n+](CC#C)c1                                                         | * | + | * | -  | 192.75 | 209.0572             | 175.2705 | 170.0991 | 194.3163 |
| 271 | Cn1cc[n+](CC=C)c1^F[B-](F)(F)F                                                                | + | + | + | #  | 192.05 | 253.4413             | 234.0386 | 263.824  | 276.1735 |
| 272 | CC(CC#N)[B-](F)(F)F^Cn1cc[n+](CC=C)c1                                                         | + | - | + | #  | 183.95 | 210.5775             | 184.2206 | 171.6457 | 205.6569 |
| 273 | CC(CC#N)[B-](F)(F)F^Cn1cc[n+](CCCC(=O)O)c1                                                    | * | - | + | -  | 214.55 | 260.2984             | 237.8173 | 236.641  | 254.6508 |
| 274 | F[B-](F)(F)F^C#CC[n+]1ccn(CC#C)c1                                                             | + | + | # | +  | 340.15 | 294.8343             | 280.9447 | 275.0572 | 285.7076 |
| 275 | CC(CC#N)[B-](F)(F)F^C#CC[n+]1ccn(CC#C)c1                                                      | + | * | # | *  | 218.05 | 224.5401             | 197.1684 | 198.9374 | 201.0723 |
| 276 | CC(CC#N)[B-](F)(F)F^C=CC[n+]1ccn(CC=C)c1                                                      | * | # | * | -  | 185.85 | <b>229.58<br/>24</b> | 193.6651 | 224.6441 | 213.2767 |
| 277 | CC(CC#N)[B-](F)(F)F^N#CCCC[n+]1ccn(CCCC#N)c1                                                  | # | # | * | +  | 203.35 | 193.8422             | 187.9574 | 166.2351 | 188.5725 |
| 278 | CC(CC#N)[B-](F)(F)F^OC(=O)CCC[n+]1ccn(CCCC(=                                                  | - | + | # | +  | 311.15 | 284.5332             | 255.7986 | 267.5251 | 276.3407 |

|     |                                                                            |   |   |   |   |               |          |          |          |                 |
|-----|----------------------------------------------------------------------------|---|---|---|---|---------------|----------|----------|----------|-----------------|
|     | O)O)c1                                                                     |   |   |   |   |               |          |          |          |                 |
| 279 | [Br-]<br>]C[C@@H](CC[n+]1ccn(C)c1)OCc2ccc<br>ce2                           | + | - | # | * | 330.15        | 362.7377 | 350.177  | 373.9961 | 348.2042        |
| 280 | C[C@@H](CC[n+]1ccn(C)c1)OCc2ccccc<br>2^F[B-](F)(F)F                        | * | * | * | - | 314.15        | 317.8555 | 298.5681 | 330.2970 | 318.9476        |
| 281 | C[C@@H](CC[n+]1ccn(C)c1)OCc2ccccc<br>2^F[P-](F)(F)(F)F                     | - | + | * | + | 365.15        | 348.2669 | 347.1103 | 345.4393 | 363.3004        |
| 282 | C[n+]1ccn(CC(Br)CBr)c1^F[P-]<br>(F)(F)(F)F                                 | - | + | # | + | 343.85        | 364.5814 | 360.3356 | 346.8735 | 362.3697        |
| 283 | C[n+]1ccn(CC(Br)CBr)c1^F[Sb-]<br>(F)(F)(F)F                                | - | - | # | - | 337.55        | 358.5214 | 332.653  | 311.6875 | 336.2064        |
| 284 | [Cl-]^C#CCCC[n+]1ccn(CCCC#C)c1                                             | - | * | - | * | 338.15        | 289.7382 | 307.1201 | 286.5218 | 321.3588        |
| 285 | F[B-]<br>(F)(F)F^C#CCCC[n+]1ccn(CCCC#C)c1                                  | + | + | + | + | 250.15        | 281.7973 | 291.069  | 274.098  | 289.39          |
| 286 | [O-]<br>S(=O)(=O)C(F)(F)F^C(c1ccccc1)[n+]2cc<br>n(Cc3ccccc3)c2             | # | - | + | - | 346.5         | 367.6693 | 331.7637 | 349.94   | 324.9473        |
| 287 | Cc1ccc(cc1)S(=O)(=O)[O-]<br>]^C(c2ccccc2)[n+]3ccn(Cc4ccccc4)c3             | - | # | + | - | 386.69        | 389.7471 | 363.3043 | 392.0767 | 380.6015        |
| 288 | [Cl-]^CC1NC(C)C(C)[NH2+] <sup>1</sup>                                      | - | * | # | + | 467.15        | 464.9687 | 406.4246 | 408.9917 | 472.2543        |
| 289 | [Cl-]^CC1N(C)CC[NH+] <sup>1</sup> C                                        | # | + | # | + | 462.15        | 440.4277 | 452.2352 | 488.9398 | 456.5055        |
| 290 | [Cl-].CC[n+]1ccn(C)c1C                                                     |   |   |   |   | <b>461.15</b> | Outlier  |          |          |                 |
| 291 | [Br-]^CC[n+]1ccn(C)c1C                                                     | + | - | - | - | 414.15        | 329.0073 | 351.1018 | 346.8524 | 350.312         |
| 292 | CC[n+]1ccn(C)c1C^FC(F)(F)S(=O)(=O)[<br>N-]S(=O)(=O)C(F)(F)F                | # | * | + | # | 300.15        | 284.4478 | 271.2005 | 286.745  | 274.6389        |
| 293 | CC[n+]1ccn(C)c1C^FC(F)(F)C(F)(F)S(=<br>O)(=O)[N-]S(=O)(=O)C(F)(F)C(F)(F)F  | - | * | - | # | 298.15        | 280.6457 | 266.5709 | 272.0569 | 275.3473        |
| 294 | CC[n+]1ccn(C)c1C^[O-]<br>]S(=O)(=O)C(F)(F)F                                | # | - | + | - | 382.15        | 323.0084 | 311.4528 | 336.2977 | 330.52          |
| 295 | CC[n+]1ccn(C)c1C^[O-]C(=O)C(F)(F)F                                         | # | - | * | + | 332.15        | 295.3002 | 297.3135 | 278.3903 | 300.8331        |
| 296 | CC[n+]1cn(C)cc1C^FC(F)(F)S(=O)(=O)[<br>N-]S(=O)(=O)C(F)(F)F                | - | + | # | - | 270           | 284.3017 | 278.0206 | 269.6281 | 290.4637        |
| 297 | CC[n+]1cn(C)cc1C^[O-]<br>]S(=O)(=O)C(F)(F)F                                | + | - | + | + | 279           | 322.8623 | 318.2729 | 319.1808 | 346.3448        |
| 298 | CCN1CCN(C)C1C^FC(F)(F)S(=O)(=O)[<br>N-]S(=O)(=O)C(F)(F)F                   | + | + | # | + | 298.15        | 291.4078 | 286.3352 | 262.4093 | 281.7323        |
| 299 | CCN1CCN(C)C1C^[O-]C(=O)c2ccccc2                                            | # | + | + | + | 288.91        | 351.3291 | 323.3831 | 305.4529 | 325.8192        |
| 300 | CCN1CCN(CC)C1C^FC(F)(F)S(=O)(=O)[<br>N-]S(=O)(=O)C(F)(F)F                  | # | - | - | + | 251           | 278.8561 | 265.7969 | 267.1414 | 284.7978        |
| 301 | CCN1CC(C)N(CC)C1^[O-]<br>]S(=O)(=O)C(F)(F)F                                | # | # | + | - | 308.15        | 349.6842 | 294.9671 | 313.8055 | 312.7349        |
| 302 | [Cl-]^CCCN1CCN(C)C1C                                                       | + | + | + | - | 411.15        | 393.8899 | 396.0165 | 394.0002 | 385.1994        |
| 303 | CCCN1CCN(C)C1C^FC(F)(F)S(=O)(=O)[<br>N-]S(=O)(=O)C(F)(F)F                  | - | * | * | * | 284.44        | 287.2637 | 283.2546 | 256.3153 | <b>272.903</b>  |
| 304 | CCC[n+]1ccn(C)c1C^F[P-](F)(F)(F)F                                          | - | + | - | * | 351.15        | 331.0136 | 311.2128 | 304.7877 | <b>309.4416</b> |
| 305 | CCC[n+]1ccn(C)c1C^FC(F)(F)C(F)(F)S(=<br>O)(=O)[N-]S(=O)(=O)C(F)(F)C(F)(F)F | # | # | # | # | 307.15        | 276.5016 | 263.4902 | 265.963  | 266.518         |

|     |                                                                                                                  |   |   |   |   |        |          |          |          |          |
|-----|------------------------------------------------------------------------------------------------------------------|---|---|---|---|--------|----------|----------|----------|----------|
| 306 | CCc1[n+](CC)ccn1C^FC(F)(F)S(=O)(=O)[N-]S(=O)(=O)C(F)(F)F                                                         | * | - | - | * | 301.15 | 333.1588 | 304.0477 | 291.7903 | 312.1592 |
| 307 | CCc1[n+](CC)ccn1C^O-]S(=O)(=O)C(F)(F)F                                                                           | - | - | * | + | 386.15 | 371.7195 | 344.3    | 341.3430 | 368.0403 |
| 308 | CCCC[n+]1ccn(C)c1C^F[B-](F)(F)F                                                                                  | - | # | # | + | 312.8  | 314.4432 | 311.1299 | 337.0688 | 301.7797 |
| 309 | CCCC[n+]1ccn(C)c1C^O=C2[N-S(=O)(=O)c3ccccc23                                                                     | + | - | * | # | 343.15 | 363.2834 | 344.1345 | 356.9429 | 351.2364 |
| 310 | CCCC[n+]1ccn(C)c1C^O-]S(=O)(=O)C(F)(F)C(F)(F)C(F)(F)C(F)(F)F                                                     | * | + | + | # | 332.15 | 293.4317 | 313.9874 | 322.7544 | 315.8555 |
| 311 | CCCC[n+]1ccn(C)c1C^O-]S(=O)(=O)OCCCC(F)(F)C(F)(F)F                                                               | - | - | - | - | 285.75 | 266.7332 | 261.7028 | 246.6091 | 275.778  |
| 312 | CCCC[n+]1ccn(C)c1C^O-]S(=O)(=O)OCC(F)(F)C(F)(F)C(F)(F)C(F)(F)F                                                   | + | - | + | * | 258.95 | 257.72   | 241.0469 | 264.5082 | 278.1695 |
| 313 | CCCCCOCCOCCOCC^CCCC[n+]1ccn(C)c1C^CCOC^COCCOCCOCCOCCOCCOCCOS(=O)(=O)[O-]                                         | + | + | # | - | 308.15 | 325.1638 | 313.6725 | 361.2187 | 310.9474 |
| 314 | CCCC[n+]1ccn(C)c1C^F[P-](F)(F)(F)(F)F                                                                            | # | # | # | + | 313    | 327.8851 | 316.328  | 294.6932 | 308.1461 |
| 315 | CCCC[n+]1ccn(C)c1C^F[Sb-](F)(F)(F)F                                                                              | + | - | * | * | 317.5  | 312.8178 | 286.1699 | 267.7832 | 281.1149 |
| 316 | CCCCCCCC[n+]1ccn(C)c1C.[O-]S(=O)(=O)C(F)(F)F                                                                     |   |   |   |   | 235.15 | Outlier  |          |          |          |
| 317 | [Cl-]^Cc1[n+](CCCC#N)ccn1C                                                                                       | * | * | + | - | 378.15 | 399.4342 | 363.1265 | 369.7858 | 374.4393 |
| 318 | Cc1[n+](CCCC#N)ccn1C^F[B-](F)(F)F                                                                                | - | - | + | - | 313.15 | 311.01   | 288.8904 | 279.4859 | 312.9334 |
| 319 | Cc1[n+](CCCC#N)ccn1C^F[P-](F)(F)(F)F                                                                             | - | + | # | # | 358.15 | 316.6129 | 351.2874 | 325.9711 | 341.154  |
| 320 | C[n+]1cn(C)cc1N(=O)=O^O-]Cl(=O)(=O)=O                                                                            | + | # | - | + | 445.15 | 414.3143 | 434.0649 | 430.2144 | 413.924  |
| 321 | C[n+]1cn(C)cc1N(=O)=O^O-]N(=O)=O                                                                                 | # | + | + | * | 436.15 | 403.0867 | 396.9622 | 404.04   | 371.9591 |
| 322 | Cn1cc[n+]2CCCCc12^FC(F)(F)S(=O)(=O)[N-]S(=O)(=O)C(F)(F)F                                                         | - | - | - | - | 356.15 | 353.6158 | 335.829  | 326.9022 | 334.5376 |
| 323 | CCCCCn1cc[n+](C)c1C^FC(F)(F)S(=O)(=O)[N-]S(=O)(=O)C(F)(F)F                                                       | * | # | # | + | 268.15 | 256.9913 | 258.65   | 239.6542 | 251.1588 |
| 324 | Cc1[n+](C)ccn1Cc2cccc(c2)[Cr](C=O)(C=O)C=O^FC(F)(F)S(=O)(=O)[N-]S(=O)(=O)C(F)(F)F                                | * | + | * | # | 341.15 | 339.5418 | 380.265  | 339.3320 | 377.7622 |
| 325 | [Br-]^CCn1cc[n+](c1)C(C)CO                                                                                       | + | + | * | + | 278.15 | 340.1809 | 301.2273 | 272.4659 | 313.6321 |
| 326 | [Br-]^CCn1cc[n+](c1)C(C)(CO)C(C)C                                                                                | * | - | - | + | 284.15 | 314.9462 | 275.5284 | 278.1521 | 299.8934 |
| 327 | [Br-]^CCn1cc[n+](c1)C(C)(CO)CC(C)C                                                                               | # | # | # | + | 288.15 | 318.5358 | 249.414  | 276.3995 | 290.8069 |
| 328 | Cc1[n+](C)ccn1CC(F)Cn2cc[n+](C)c2C^FC(F)(F)S(=O)(=O)[N-]S(=O)(=O)C(F)(F)F^FC(F)(F)S(=O)(=O)[N-]S(=O)(=O)C(F)(F)F | + | # | # | + | 359.35 | 383.9441 | 395.8652 | 422.0263 | 376.2219 |
| 329 | C[n+]1ccn(C)c1c2[n+](C)ccn2C^F[P-](F)(F)(F)F^F[P-](F)(F)(F)F                                                     | # | - | - | * | 390.15 | 406.2294 | 388.4336 | 385.7337 | 368.0916 |
| 330 | C[n+]1ccn(C)c1c2[n+](C)ccn2C^FC(F)(F)S(=O)(=O)[N-]S(=O)(=O)C(F)(F)F^FC(F)(F)S(=O)(=O)[N-]S(=O)(=O)C(F)(F)F       | + | + | - | - | 366.15 | 397.5173 | 401.2408 | 390.9668 | 389.5623 |

|     |                                                                                                                                                                           |   |   |   |   |        |          |          |          |          |
|-----|---------------------------------------------------------------------------------------------------------------------------------------------------------------------------|---|---|---|---|--------|----------|----------|----------|----------|
| 331 | CCCCn1cc[n+](C)c1c2[n+](C)ccn2CCCC<br>^F[P-](F)(F)(F)(F)F^F[P-](F)(F)(F)(F)F                                                                                              | - | + | - | - | 348.15 | 377.2369 | 368.9439 | 347.2146 | 348.5621 |
| 332 | +:CCCC[n+]1ccn(CCCC)c1c2[n+](CCCC<br>)ccn2CCCC^FC(F)(F)S(=O)(=O)[N-<br>]S(=O)(=O)C(F)(F)F^FC(F)(F)S(=O)(=O)<br>[N-]S(=O)(=O)C(F)(F)F                                      | - | - | + | * | 368.15 | 350.7916 | 358.4652 | 342.3669 | 354.7059 |
| 333 | CCCCn1cc[n+](CCCC(F)(F)F)c1c2[n+](C<br>CCC(F)(F)F)ccn2CCCC^FC(F)(F)S(=O)(<br>=O)[N-<br>]S(=O)(=O)C(F)(F)F^FC(F)(F)S(=O)(=O)<br>[N-]S(=O)(=O)C(F)(F)F                      | + | + | - | + | 392.15 | 340.7591 | 358.0286 | 368.8274 | 352.1366 |
| 334 | C[n+] <sup>1</sup> ccn2CCCCc12^FC(F)(F)S(=O)(=O)<br>)N-]S(=O)(=O)C(F)(F)F                                                                                                 | * | - | * | + | 319.15 | 318.2878 | 333.2805 | 291.4444 | 342.9971 |
| 335 | CC[n+] <sup>1</sup> ccn(CC)c1C^FC(F)(F)S(=O)(=O)<br>[N-]S(=O)(=O)C(F)(F)F                                                                                                 | - | + | - | * | 251.15 | 271.896  | 250.6622 | 291.4772 | 277.7044 |
| 336 | Cc1[n+](C)cc(N(=O)=O)n1C^[O-<br>]Cl(=O)(=O)=O                                                                                                                             | * | + | + | * | 459.15 | 401.9288 | 446.5323 | 460.7164 | 446.7793 |
| 337 | Cc1[n+](C)cc(N(=O)=O)n1C^[O-<br>]N(=O)=O                                                                                                                                  | * | * | # | + | 434.15 | 400.0475 | 429.0342 | 431.4499 | 413.7543 |
| 338 | CCn1c(C)[n+](C)cc1N(=O)=O^[O-<br>]Cl(=O)(=O)=O                                                                                                                            | + | + | * | # | 419.15 | 396.8987 | 426.8623 | 411.3445 | 411.6182 |
| 339 | CCn1c(C)[n+](C)cc1N(=O)=O^[O-<br>]N(=O)=O                                                                                                                                 | - | + | + | - | 338.15 | 385.6711 | 389.7596 | 385.1701 | 369.6533 |
| 340 | [I-]^Cc1c(C)n(C)c(C)[n+] <sup>1</sup> C                                                                                                                                   | + | - | # | + | 486.15 | 479.7531 | 464.764  | 495.0438 | 507.076  |
| 341 | Cc1c(C)n(C)c(C)[n+] <sup>1</sup> C^FC(F)(F)S(=O)(<br>=O)[N-]S(=O)(=O)C(F)(F)F                                                                                             | * | # | - | * | 391.15 | 338.5004 | 382.0706 | 385.3817 | 393.7692 |
| 342 | Cc1c(C)n(C)c(C)[n+] <sup>1</sup> C^F[P-<br>](F)(F)(F)(F)F                                                                                                                 | * | * | * | + | 439.15 | 389.2103 | 425.1636 | 409.5184 | 437.4013 |
| 343 | +:C[n+] <sup>1</sup> c(Br)c(Br)n(C)c1Br^F[B-<br>](F)(F)F                                                                                                                  | + | - | - | # | 541.15 | 529.9626 | 493.3267 | 475.0117 | 489.4413 |
| 344 | [Br-]^Br-<br>]^CCCCCCCCCCCCCn1cc[n+](CCCC[<br>n+] <sup>2</sup> ccn(CCCCCCCCCCCC)c2)c1                                                                                     | - | + | # | - | 331.15 | 355.329  | 333.3043 | 304.2208 | 356.4602 |
| 345 | CCCCn1cc[n+](CC(F)(F)C(F)(F)C(F)(F)C<br>[n+] <sup>2</sup> ccn(CCCC)c2)c1^FC(F)(F)S(=O)(=O)<br>[N-<br>]S(=O)(=O)C(F)(F)F^FC(F)(F)S(=O)(=O)<br>[N-]S(=O)(=O)C(F)(F)F        | + | * | * | + | 322.35 | 307.7707 | 362.4192 | 328.2382 | 318.4926 |
| 346 | CCCCn1cc[n+](CC(F)(F)C(F)(F)C(F)(F)C<br>(F)(F)C[n+] <sup>2</sup> ccn(CCCC)c2)c1^FC(F)(F)S<br>(=O)(=O)[N-<br>]S(=O)(=O)C(F)(F)F^FC(F)(F)S(=O)(=O)<br>[N-]S(=O)(=O)C(F)(F)F | * | + | + | # | 347.55 | 305.714  | 355.4343 | 341.6811 | 316.8074 |
| 347 | CCCCn1cc[n+](Cc2ccc(C[n+] <sup>3</sup> ccn(CCCC<br>)c3)cc2)c1^FC(F)(F)S(=O)(=O)[N-<br>]S(=O)(=O)C(F)(F)F^FC(F)(F)S(=O)(=O)<br>[N-]S(=O)(=O)C(F)(F)F                       | - | - | - | * | 322.45 | 330.4326 | 304.7207 | 319.5595 | 328.6356 |
| 348 | CCCCCCCCCCCCCn1cc[n+](Cc2ccc(C[n+]<br>3ccn(CCCCCCCCCC)c3)cc2)c1^FC(F)(F)<br>)S(=O)(=O)[N-<br>]S(=O)(=O)C(F)(F)F^FC(F)(F)S(=O)(=O)<br>[N-]S(=O)(=O)C(F)(F)F                | # | * | - | - | 341.55 | 338.9047 | 327.7462 | 319.5621 | 343.1791 |
| 349 | CCCCCCCCCCCCCn1cc[n+](Cc2ccc(C<br>[n+] <sup>3</sup> ccn(CCCCCCCCCCCC)c3)cc2)c<br>1^FC(F)(F)S(=O)(=O)[N-<br>]S(=O)(=O)C(F)(F)F^FC(F)(F)S(=O)(=O)<br>[N-]S(=O)(=O)C(F)(F)F  | + | + | - | * | 356.15 | 360.0112 | 346.119  | 333.4495 | 353.9751 |

|     |                                                                                                                                      |   |   |   |   |        |                 |          |          |          |
|-----|--------------------------------------------------------------------------------------------------------------------------------------|---|---|---|---|--------|-----------------|----------|----------|----------|
| 350 | CCCCn1cc[n+](Cc2c(F)c(F)c(C[n+]3ccn(CCCC)c3)c(F)c2F)c1^FC(F)(F)S(=O)(=O)[N-]S(=O)(=O)C(F)(F)F^FC(F)(F)S(=O)(=O)[N-]S(=O)(=O)C(F)(F)F | - | * | # | - | 345.15 | 368.379         | 293.1122 | 354.3587 | 345.3024 |
| 351 | [Br-]^Br-]^Cn1cc[n+](C[C@@H](OC(=O)c2ccccc2)[C@@H](C[n+]3ccn(C)c3)OC(=O)c4ccccc4)c1                                                  | + | # | # | * | 455.15 | 428.3282        | 429.8707 | 370.137  | 389.6705 |
| 352 | Cn1cc[n+](C[C@@H](OC(=O)c2ccccc2)[C@@H](C[n+]3ccn(C)c3)OC(=O)c4ccccc4)c1^F[B-](F)(F)F^F[B-](F)(F)F                                   | - | + | - | - | 402.15 | <b>378.1604</b> | 395.9311 | 407.4105 | 390.4497 |
| 353 | Cn1cc[n+](C[C@@H](OC(=O)c2ccccc2)[C@@H](C[n+]3ccn(C)c3)OC(=O)c4ccccc4)c1^F[P-](F)(F)(F)F^F[P-](F)(F)(F)F                             | + | + | - | - | 361.15 | 390.1121        | 372.5588 | 374.0089 | 355.1117 |
